# Supplementary material
Source: Springer Nature journal article supplement (https://www.springermedizin.de/resource/supplementary/12931_2010_1038_MOESM7_ESM.pdf/9425426)

**a****%Phagocytosing**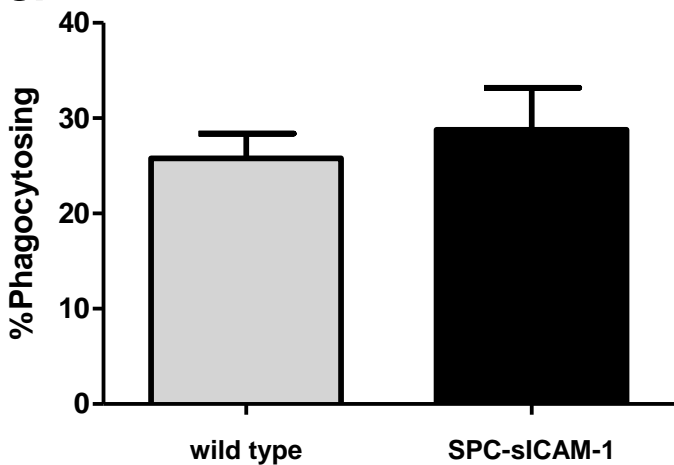**b****Ingested Beads**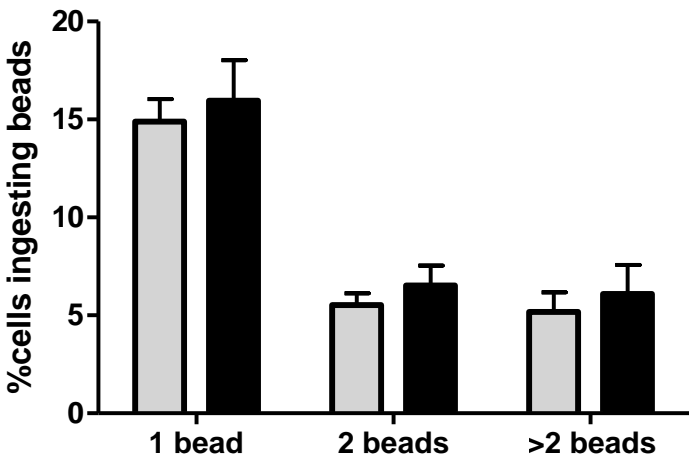

Supplement: MOESM7 [file 9425426]
